# Supplementary material
Source: Research Square preprint supplement (doi:10.21203/rs.3.rs-9310896/v1)

Figure: 4 Training Modules & their Content


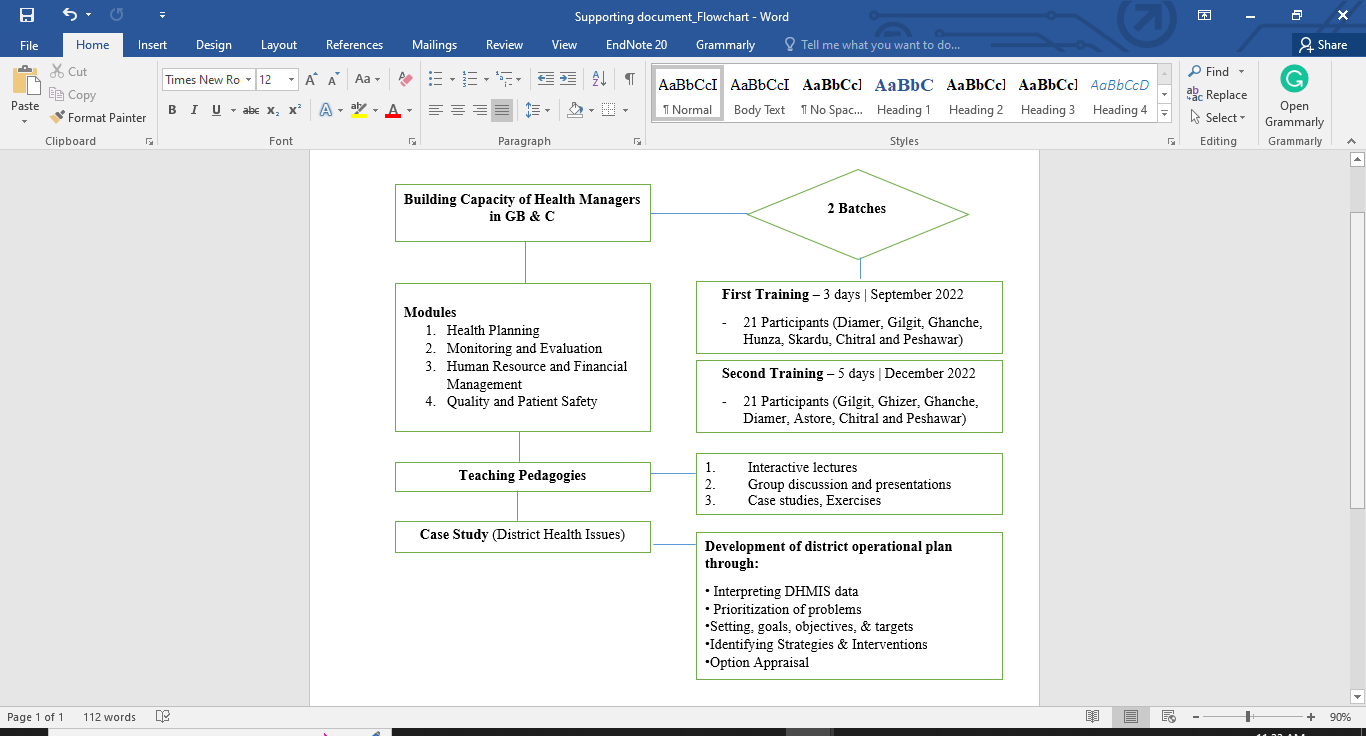


Figure 2 Training Batches, Modules, Teaching Pedagogies, and Case Study

**Annexure 2**

| **Table 1: Participants' Key Characteristics (n=44)** | | |
| --- | --- | --- |
| **Categories** | **Sub-categories** | **Number** |
| Gender | Male | 35 |
| Female | 09 |
| Province/Regions | Gilgit Baltistan (GB) | 27 |
| Khyber Pakhtunkhwa (KP) | 17 |
| Current Position | Programme/Service Directors | 17 |
| District Health Officers | 7 |
| District Population Welfare Officers | 8 |
| Others | 12 |
| Education Level | Masters | 17 |
|  | Medical Doctors | 7 |
|  | Bachelors | 12 |
| Years of experience | 15-20 Years | 25 |
|  | 10-14 Years | 12 |
|  | 5-13 Years | 7 |

**Annexure 3**

Figure 3 - Evaluation of Course Against Indicators

Figure 4 - Overall Rating of Course

Figure 5 - Results from Knowledge Assessment

Table 2: Thematic analysis of recommendations provided by Course participants.

| **S.no** | **Theme** | **Verbatim** |
| --- | --- | --- |
|  | Sustainability of course for future | - The time allocated for the training activity is too little, which should be increased in future activities. - Need practical activities for improvement in the system where the participants come according to their needs and demands. - Time may be enhanced/ increased for such training, and it should be based on public side demand/ issues. - This type of management course should be arranged at the GB level in coordination with DoH - Course designing on the public sector issues and problems and their solutions of the subject in training |
|  | Enhance project management | - This course will help in the development of the strategic and operational plan. - Created knowledge of quality assurance, Supply chain management, and disease outbreak management - It would be very good if all the processes were shown practically instead of sitting in class. |
|  | Practical demonstration of financial management | - More time should be allocated to the HSS career. - The course design, especially Healthcare financing and supply chain management should be in context to the government health system. - More practice/ practical demonstration and field visits should be a part of the training. |
|  | Recommendation for more courses | - Separate certificate-level courses for health managers should be offered. - Understood operational Plans Development - Useful knowledge about disease Surveillance and Outbreak Management |

**Evaluation Indicators:**

1. Objectives of the activity defined
2. Disclosure slide shown
3. Overall presentations were at the participants` level of understanding
4. Acquired new knowledge
5. Time management
6. Queries responded
7. Adequacy of online sessions` logistic support
8. Overall assessment of the course
9. Relative to where you were before participating in this activity, please rate how well this activity has affected your ability to understand the topic/subject.
10. Based on your participation today, how will you rate this activity as a recommendation to your peer/colleagues


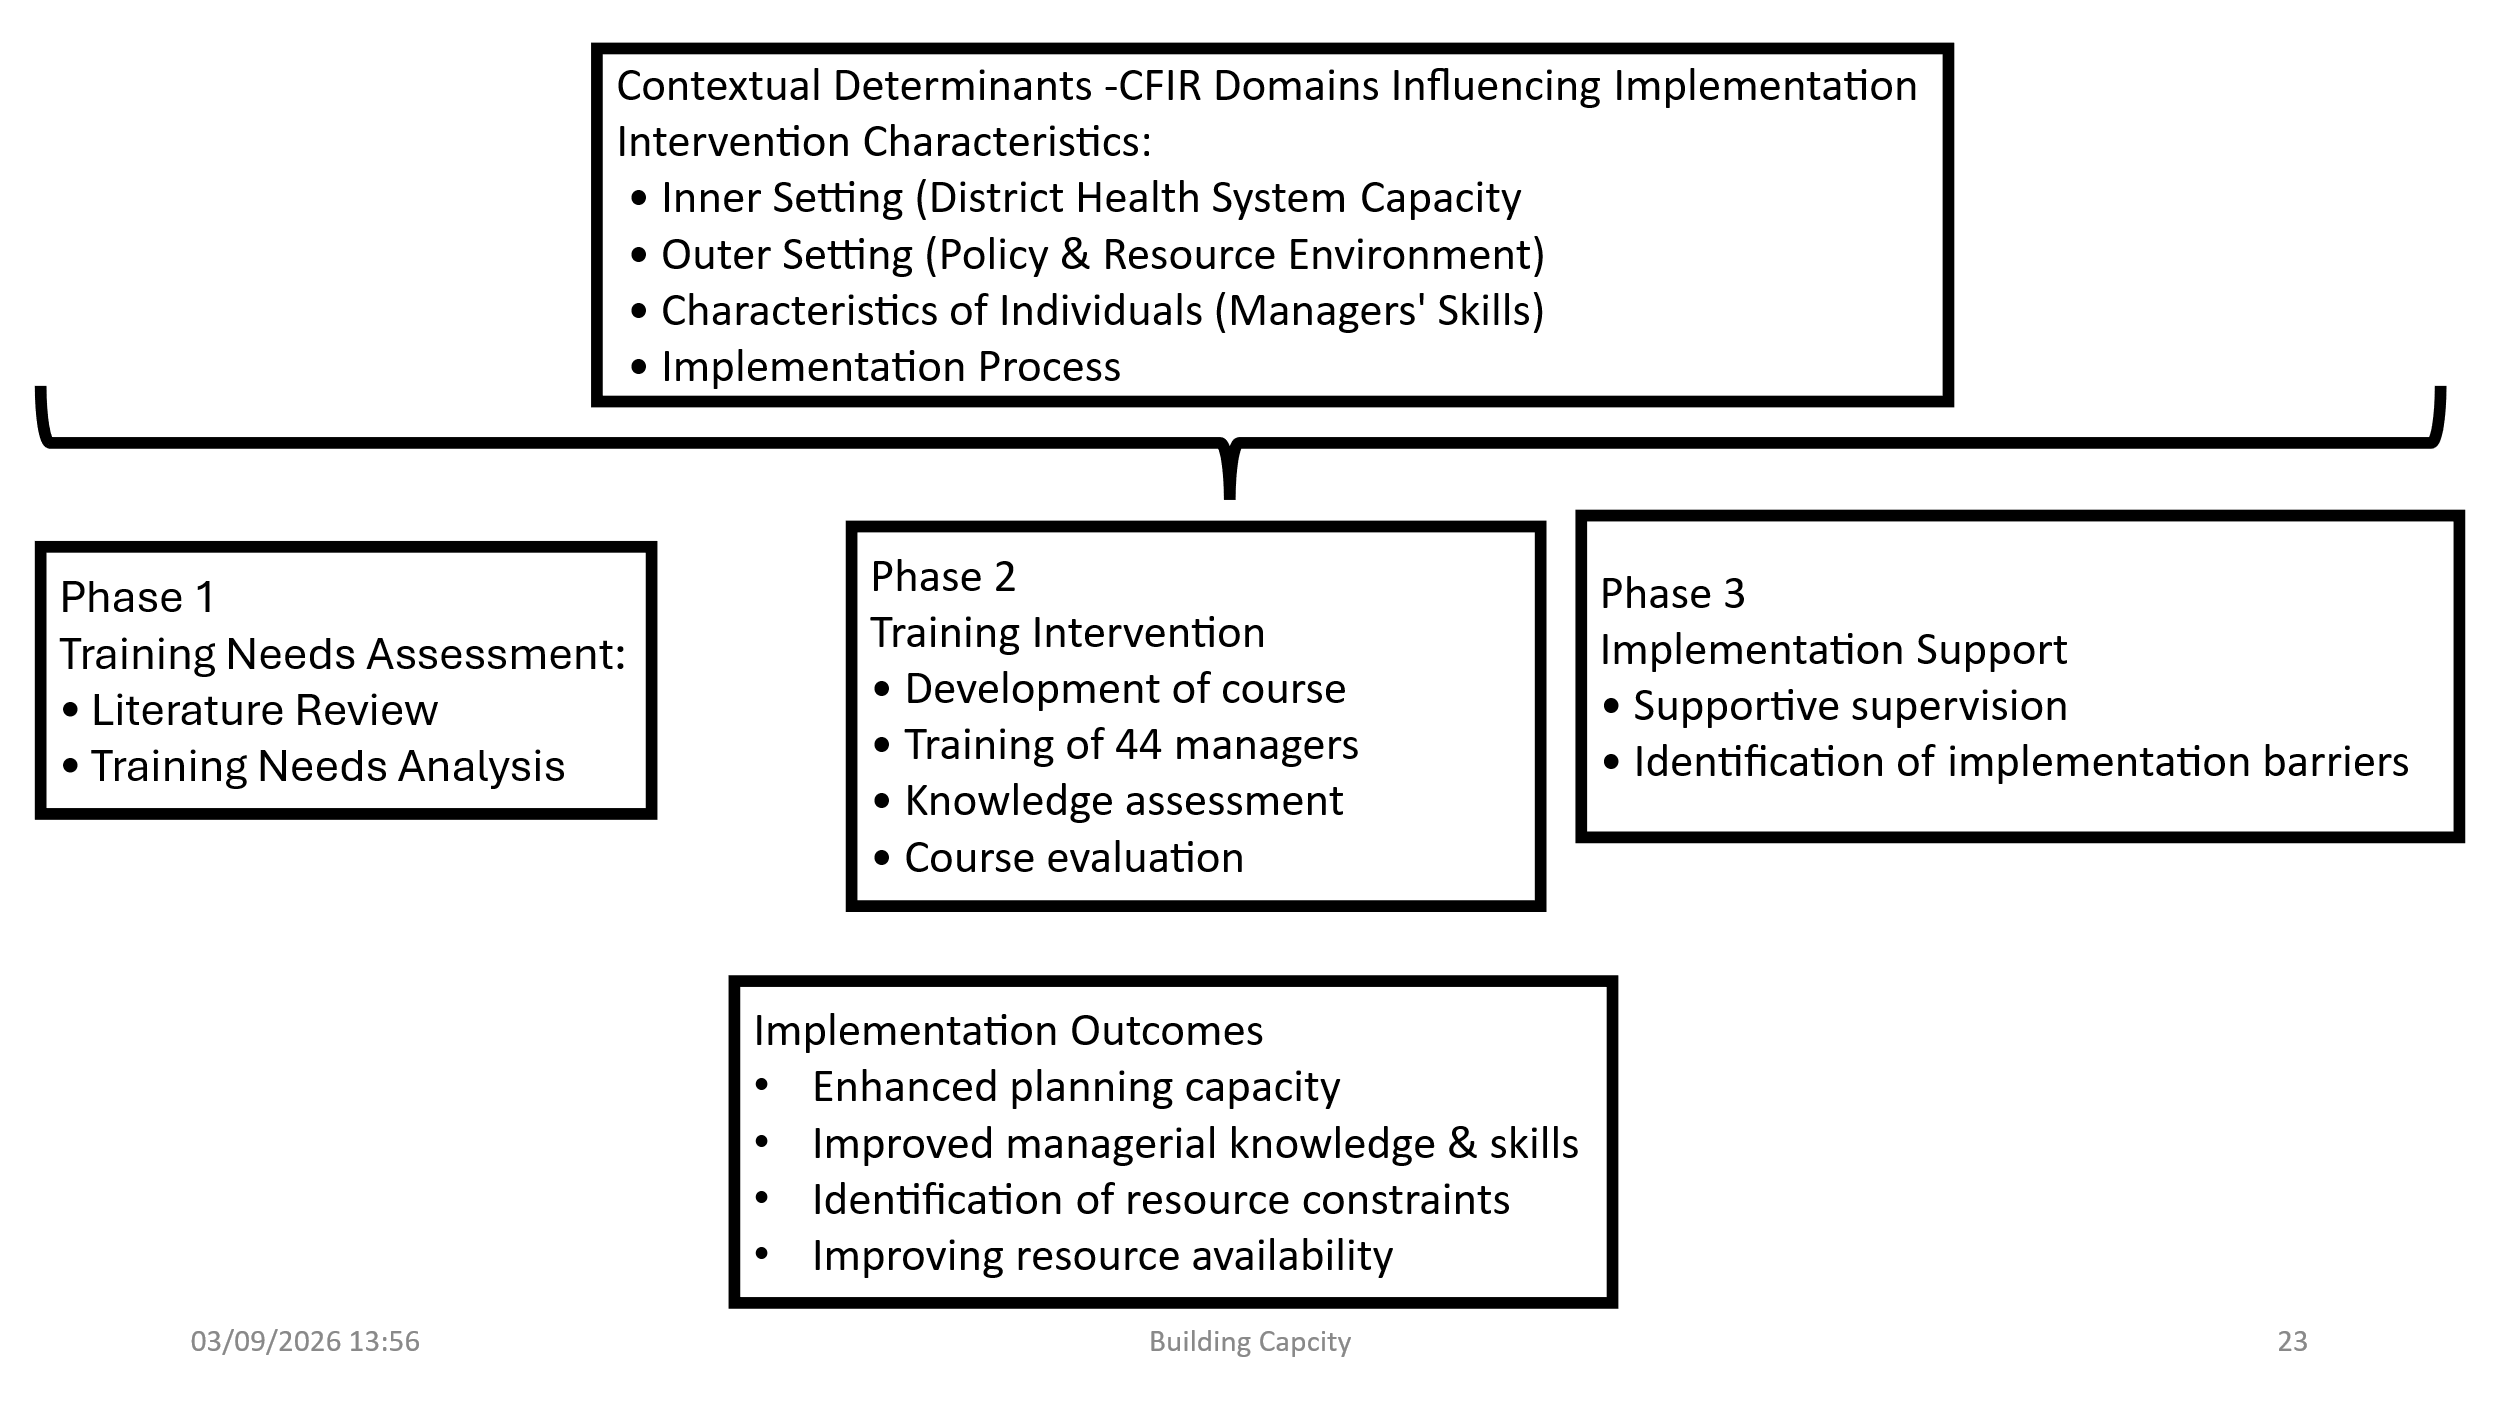

Supplement: Supplementary file 1 [file 4bf0b2ad6d3991517c7efa22.docx]
